# Supplementary material for: Associations of Prematurity and Low Birth Weight With Blood Pressure and Kidney Function in Middle-aged Participants of the Brazilian Longitudinal Study of Adult Health – ELSA-Brasil
Source: Research Square preprint supplement (doi:10.21203/rs.3.rs-660337/v1), 2021-08-12
Supplement: Supplementary file 1 [file 0a158c281d100e5a23847f13.docx]

**SUPPLEMENTARY MATERIAL**

**Figure S1.** Direct acyclic graph for blood pressure (panel A) and estimated glomerular filtration rate and albumin-to-creatinine ratio (panel B).

**A**

**B**
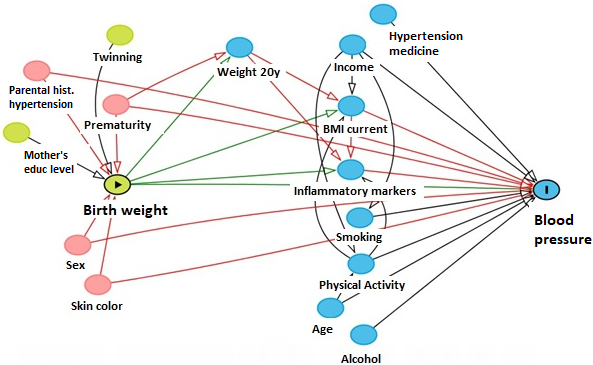


**
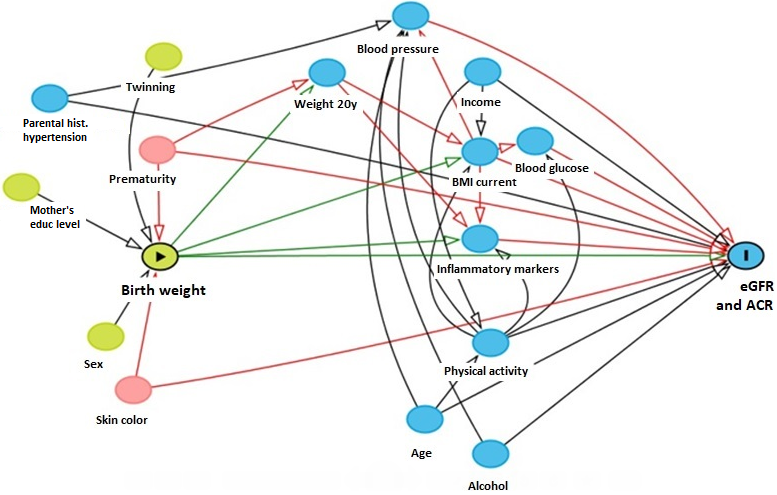
**

|  | **Normal Birth Weight**  **n = 647** | **Low Birth Weight**  **n = 55** | ***P*-value** |
| --- | --- | --- | --- |
| Systolic blood pressure (mmHg) | 115.3 (14.3) | 119.4 (14.8) | **0.031** |
| Diastolic blood pressure (mmHg) | 73.9 (10.3) | 76.6 (10.7) | **0.046** |

**Table S1.** Blood pressure levels in normal and low birth weight participants excluding those in use of antihypertensive agents (n = 66).

Student´s *t-*test was used, and data expressed as mean (SD).

**Table S2**. Baseline characteristics of full-term and preterm born participants.

|  | **Full-term**  **(n = 729)** | **Preterm**  **(n = 39)** | ***P*-value** |
| --- | --- | --- | --- |
| Systolic blood pressure (mmHg) | 116.3 (14.7) | 122.2 (14.2) | 0.015 |
| Diastolic blood pressure (mmHg) | 74.7 (10.5) | 78.9 (11.0) | 0.022 |
| Creatinine (mg/dL) | 0.89 (0.18) | 0.87 (0.15) | 0.288 |
| eGFR (ml/min/1.73m2) | 89.6 (13.9) | 90.0 (12.4) | 0.842 |
| Albumin-creatinine ratio (mg/g) * | 6.4 (4.9-7.9) | 7.1 (5.4-8.8) | 0.149 |
| Cystatin C (mg/L)* | 0.62 (0.37-0.92) | 0.52 (0.37-0.77) | 0.169 |

eGFR, estimated glomerular filtration rate.

Student´s *t-test* or *Wilcoxon´s test was used, and data expressed as mean (SD) or median (interquartile range).

**Table S3.** Association of prematurity with systolic and diastolic blood pressure levels.

|  | **β** | **95% CI** | ***P-*value** |
| --- | --- | --- | --- |
| **Systolic blood pressure** |  |  |  |
| Model 1 | 5.94 | 1.26 – 10.62 | 0.013 |
| Model 2 | 6.42 | 1.68 – 11.15 | 0.008 |
| Model 3 | 7.70 | 3.28 – 12.14 | < 0.001 |
| **Diastolic blood pressure** |  |  |  |
| Model 1 | 4.33 | 0.97 – 7.68 | 0.012 |
| Model 2 | 4.46 | 1.05 – 7.86 | 0.010 |
| Model 3 | 5.25 | 2.01 – 8.49 | 0.002 |

Model 1: adjusted for skin color.

Model 2: adjusted for skin color and parental history of hypertension.

Model 3: adjusted for skin color, parental history of hypertension, and sex.

**Table S4.** Propensity score. Standardized mean differences in adjustment variables to estimate association of LBW with blood pressure and kidney function markers in ELSA-Brasil participants, 2008 - 2010.

| **Variables** | **Summary of balance** | | |
| --- | --- | --- | --- |
| **Crude balance** | **Balance for matched data** | **% Balance improvement** |
| Systolic blood pressure (n = 48) |  |  |  |
| SBP | 0.332 | 0.002 | 99.38 |
| Skin color | 0.122 | 0.042 | 65.80 |
| Parental history of hypertension | -0.083 | 0.000 | 100.0 |
| Sex | -0.0097 | 0.018 | 99.78 |
| Prematurity | 0.788 | 0.000 | 100.0 |
| Diastolic blood pressure (n = 61) |  |  |  |
| DBP | 0.272 | -0.018 | 93.44 |
| Skin color | 0.122 | 0.042 | 65.80 |
| Parental history of hypertension | -0.083 | -0.045 | 45.44 |
| Sex | -0.009 | 0.041 | 97.80 |
| Prematurity | 0.788 | 0.000 | 100.0 |
| Albumin-to-creatinine ratio (n = 49) |  |  |  |
| ACR | 0.149 | 0.012 | 91.60 |
| Skin color | -0.129 | 0.000 | 100.0 |
| Prematurity | 0.794 | 0.000 | 100.0 |
| Estimated glomerular filtration rate (n = 44) |  |  |  |
| eGFR | -0.240 | -0.054 | 77.54 |
| Skin color | 0.122 | 0.000 | 100.0 |
| Prematurity | 0.794 | 0.000 | 100.0 |

SBP, systolic blood pressure; DBP, diastolic blood pressure; ACR, albumin-to-creatinine ratio; eGFR, estimated glomerular filtration rate.
